# Supplementary material
Source: PubMed Central journal article supplement (PMC8604396)

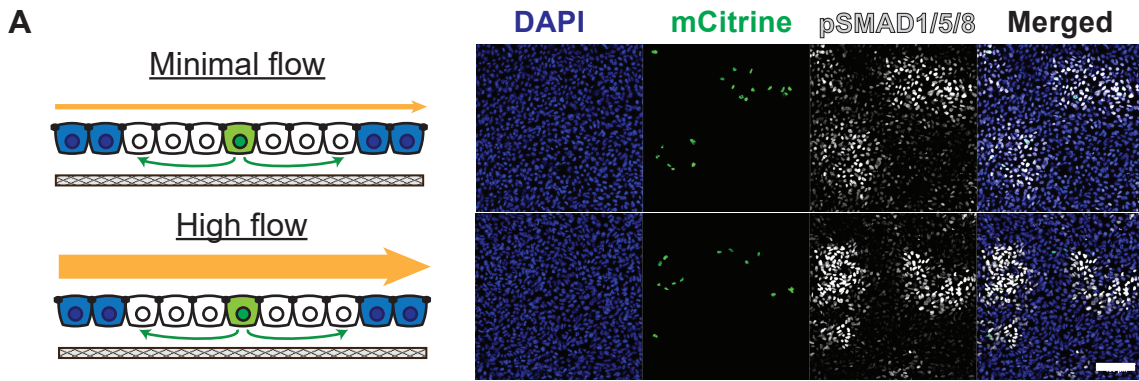

- Minimal flow (10  $\mu\text{l hr}^{-1}$ )
- High apical flow (1000  $\mu\text{l hr}^{-1}$ )
- pSMAD1/5/8- cell
- pSMAD1/5/8+ cell
- BMP4-secreting cell
- NOGGIN-secreting cell
- ▨ Glass substrate

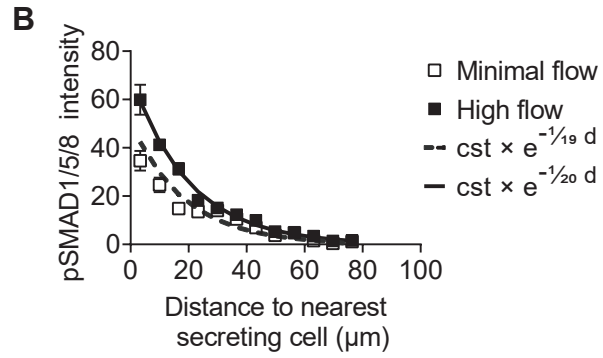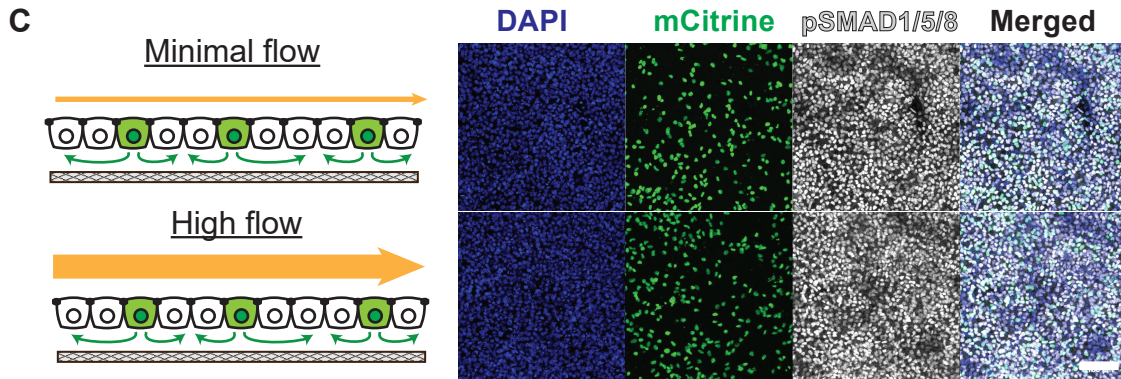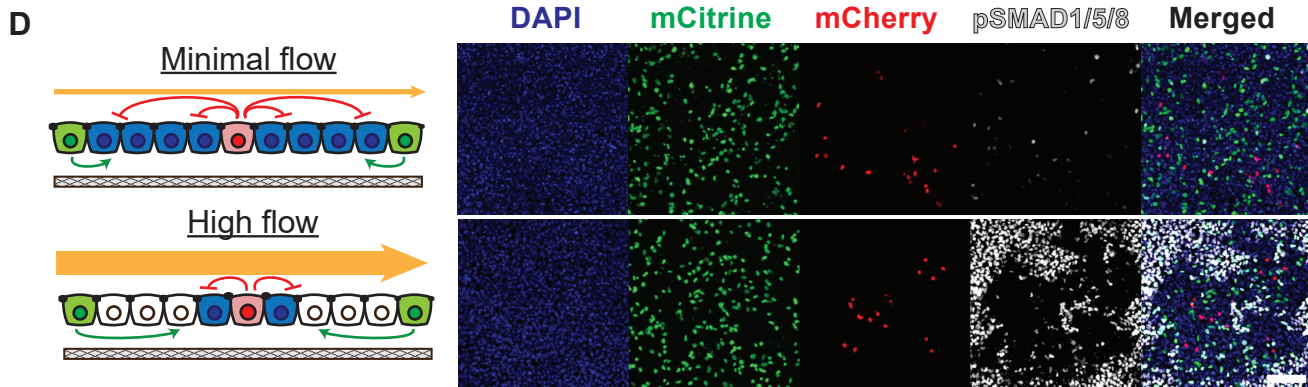

Supplement: NIHMS1702277-supplement-4.pdf [file NIHMS1702277-supplement-4.pdf]
