# Supplementary material
Source: PubMed Central journal article supplement (PMC8604396)
Supplement: NIHMS1702277-supplement-7.pdf [file NIHMS1702277-supplement-7.pdf]

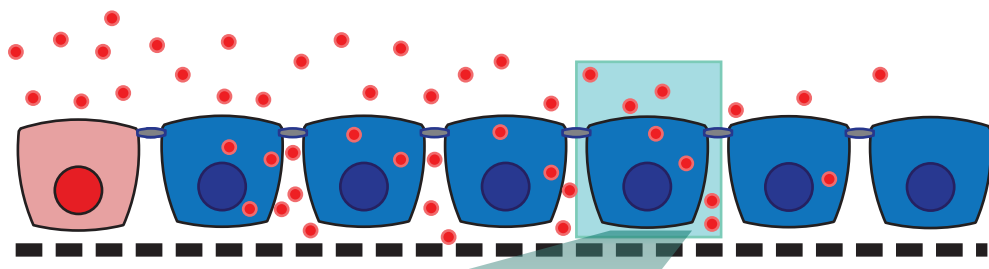

-  NOGGIN secreting cell
-  NOGGIN receiving cell
-  NOGGIN
-  Tight junction
-  Filter

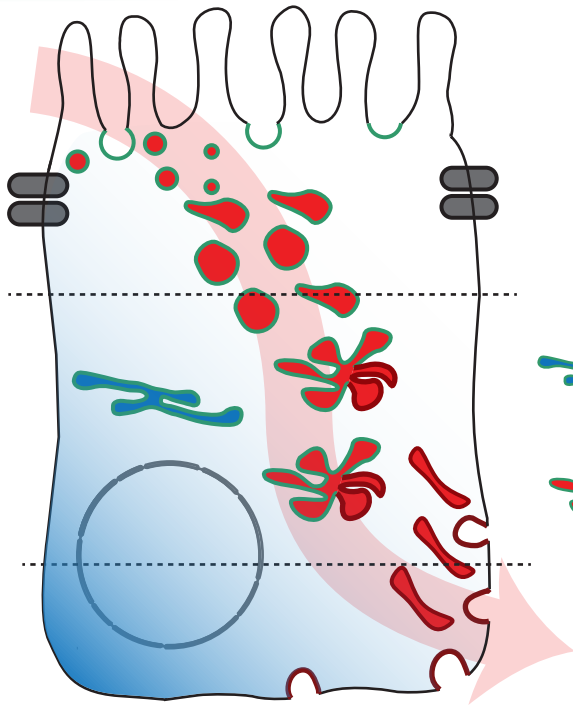

- | <u>Vesicle type</u>                                                                                                | <u>Marker</u>    |
|--------------------------------------------------------------------------------------------------------------------|------------------|
|  pinocytotic vesicle              | Dextran (10 kDA) |
|  apical sorting endosome (ASE)    | WGA (10')        |
|  early endosome (EE)              | EEA1             |
|  apical recycling endosome (ARE)  | Rab11a           |
|  common recycling endosome (CRE) | Tf (45')         |
|  basal sorting endosome (BSE)   | Tf (5')          |
