# Supplementary material
Source: PubMed Central journal article supplement (PMC8604396)

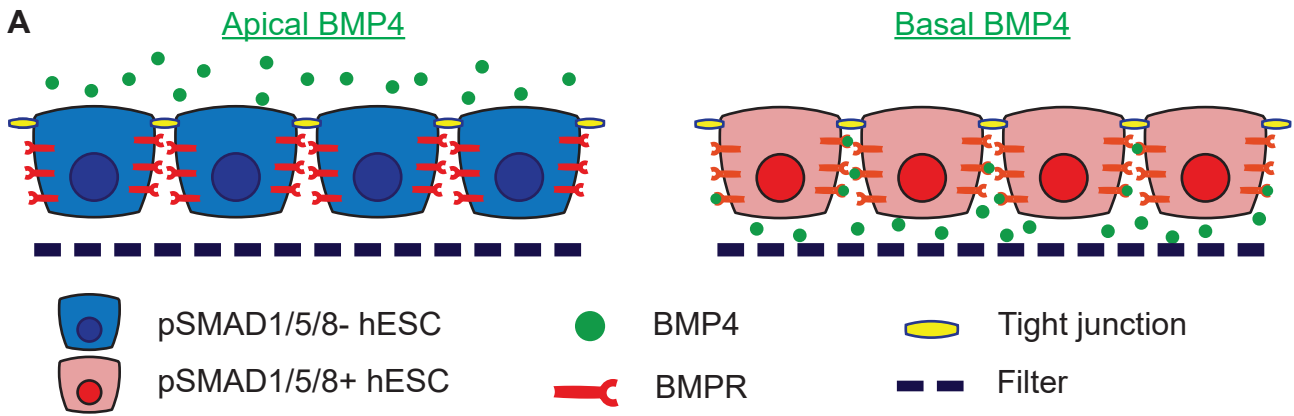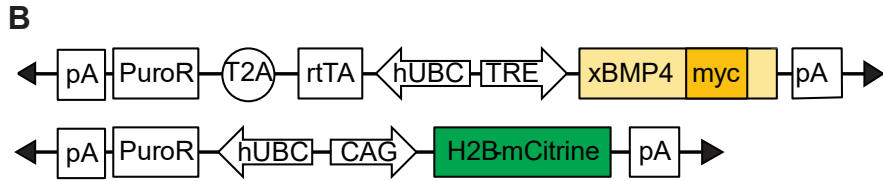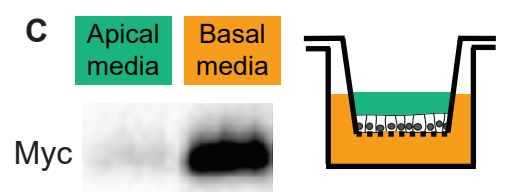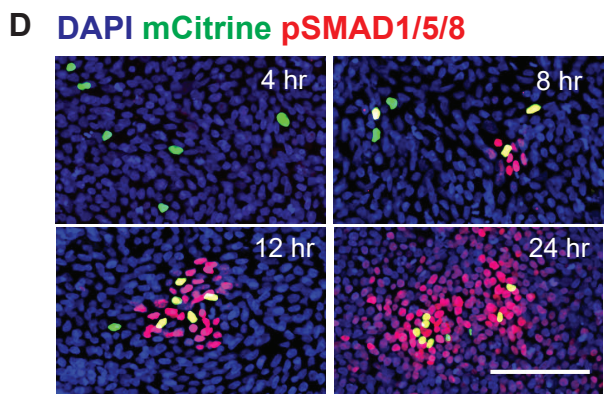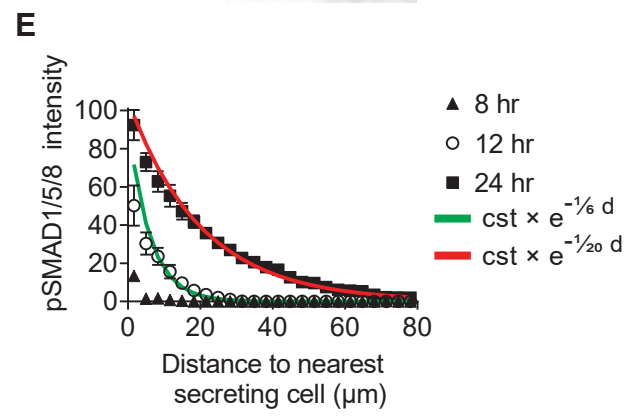

Supplement: NIHMS1702277-supplement-1.pdf [file NIHMS1702277-supplement-1.pdf]

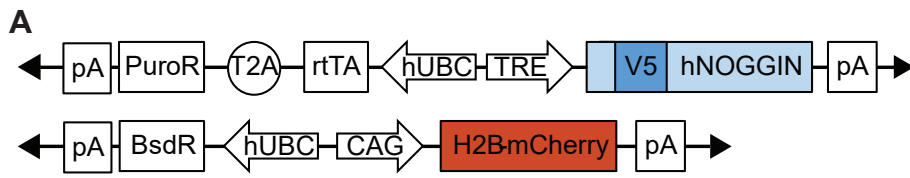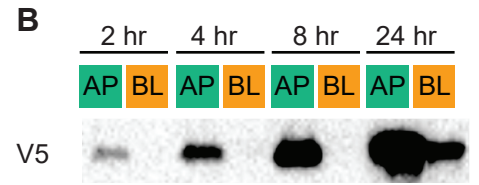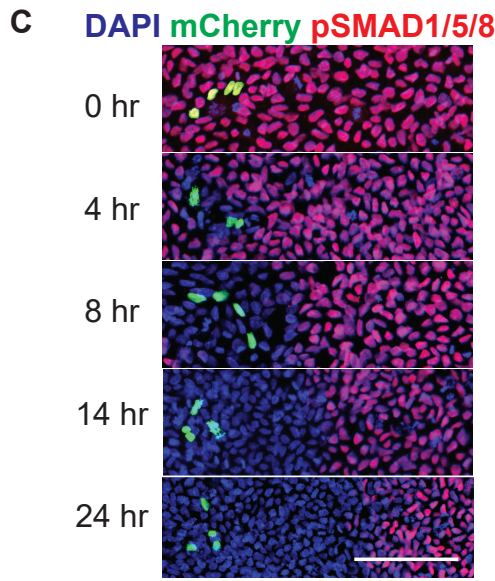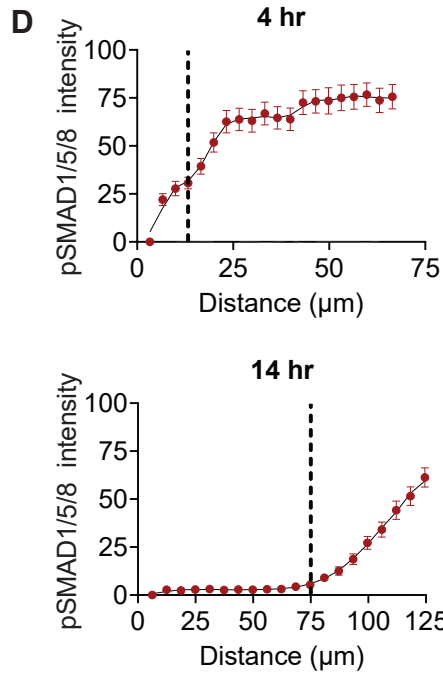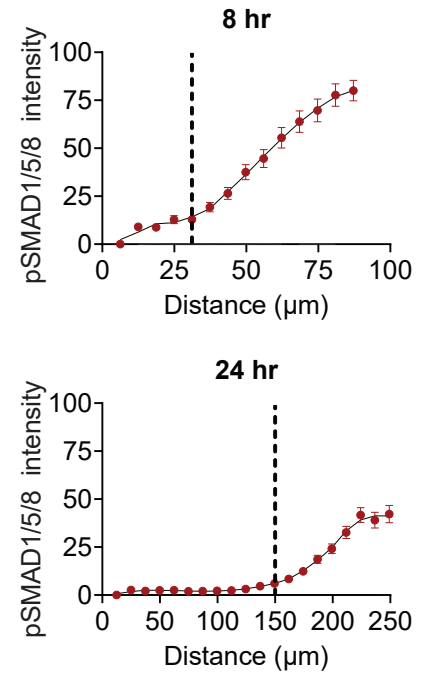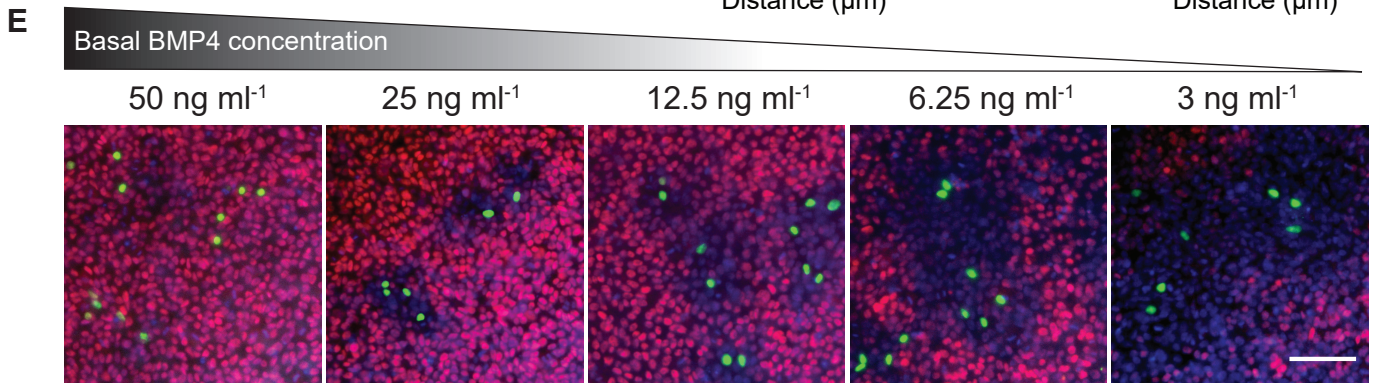

DAPI mCherry pSMAD1/5/8

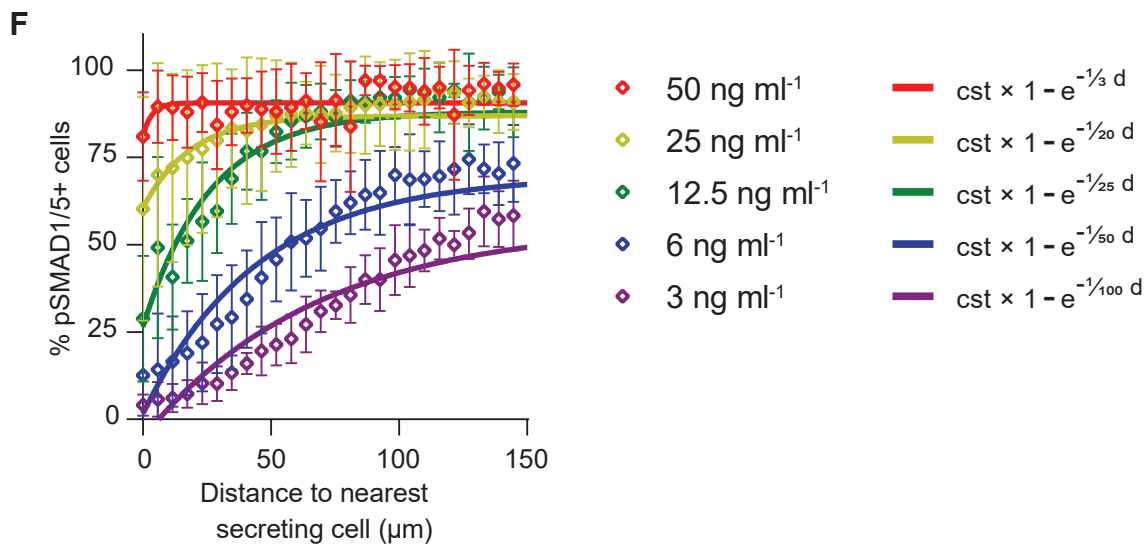

Supplement: NIHMS1702277-supplement-2.pdf [file NIHMS1702277-supplement-2.pdf]

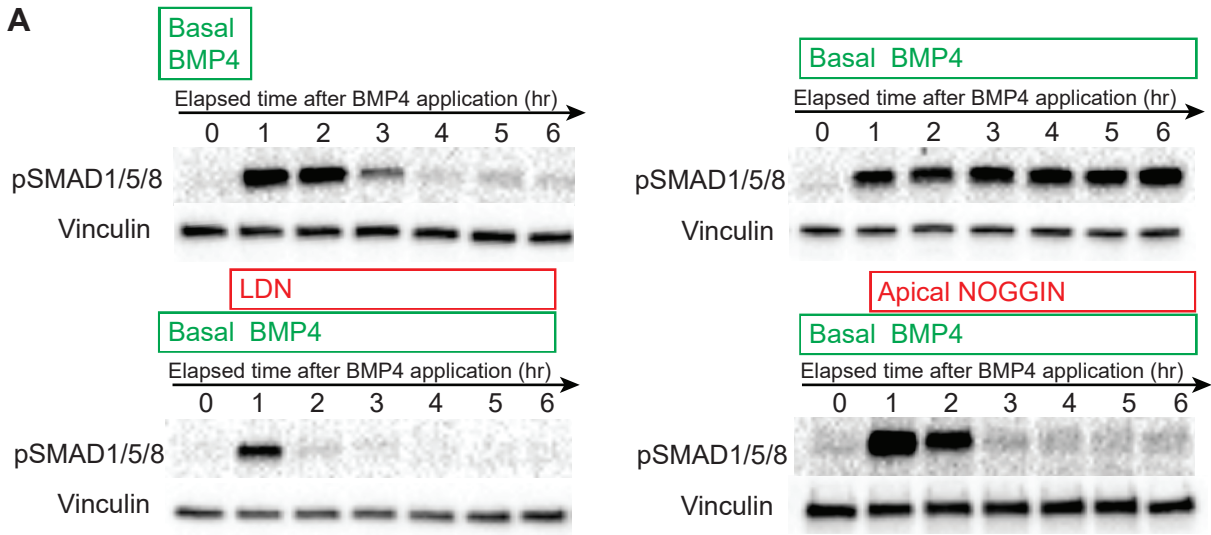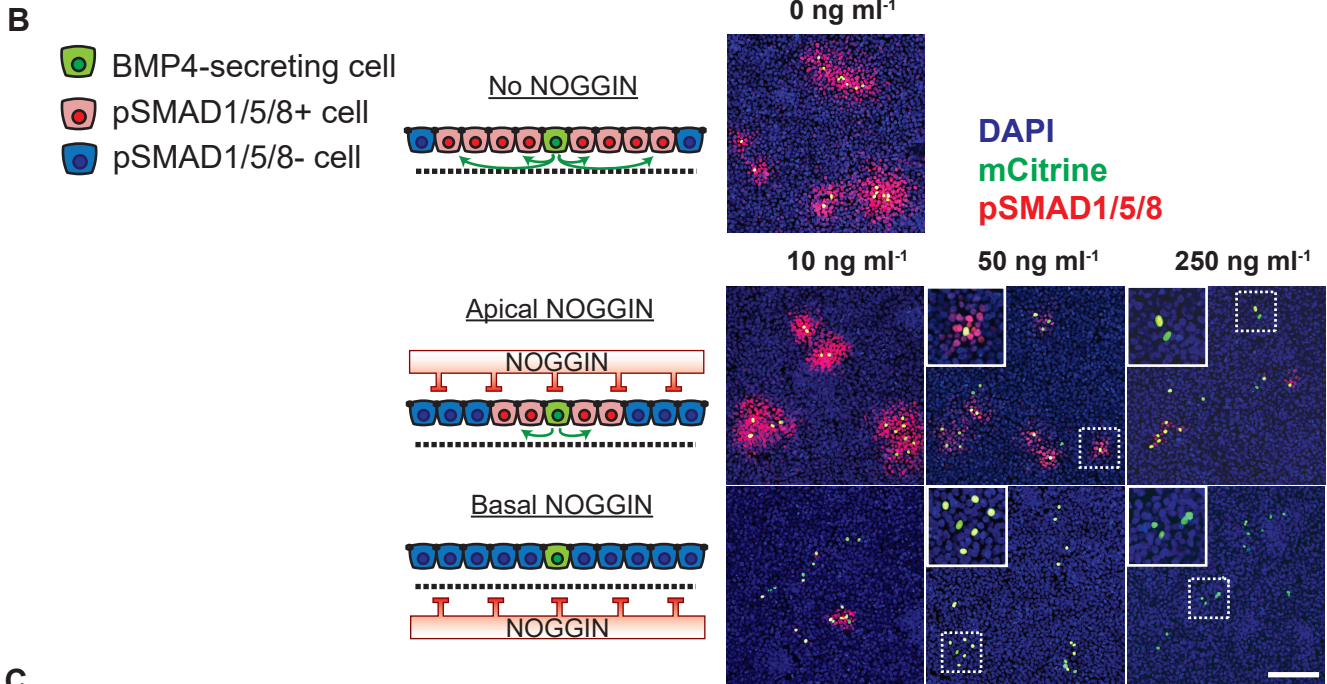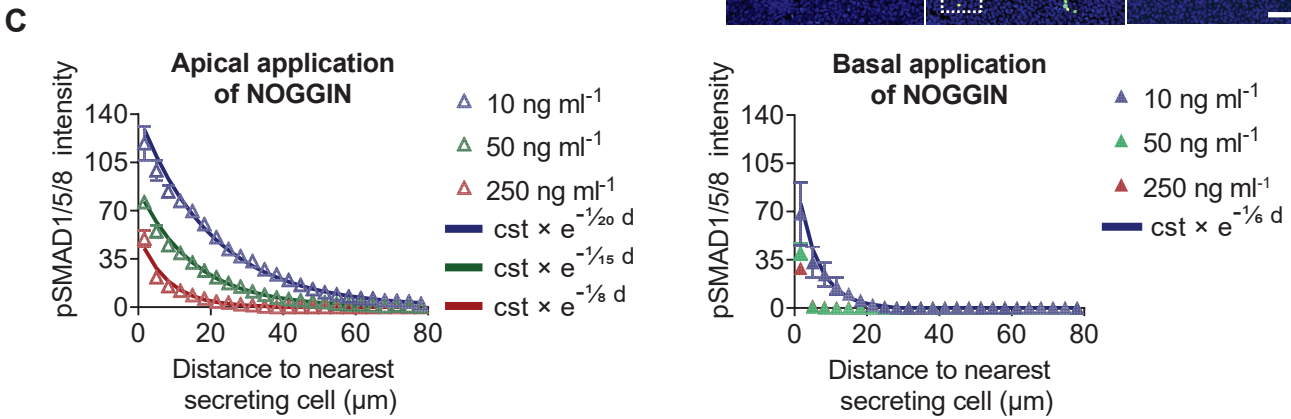

Supplement: NIHMS1702277-supplement-3.pdf [file NIHMS1702277-supplement-3.pdf]

**A** DAPI V5 pSMAD1/5/8 ZO-1

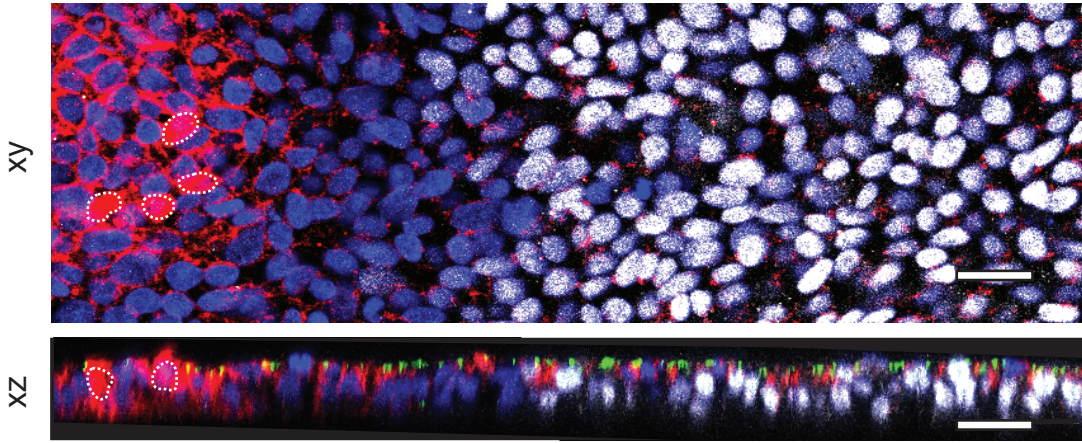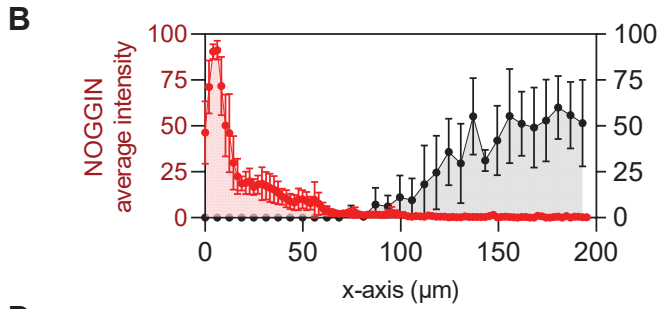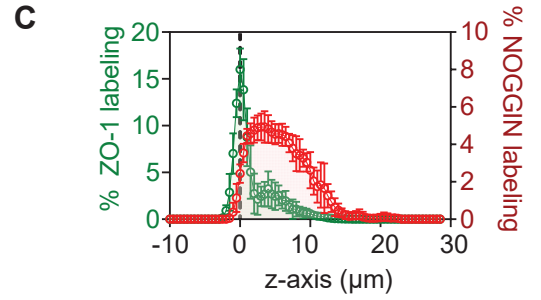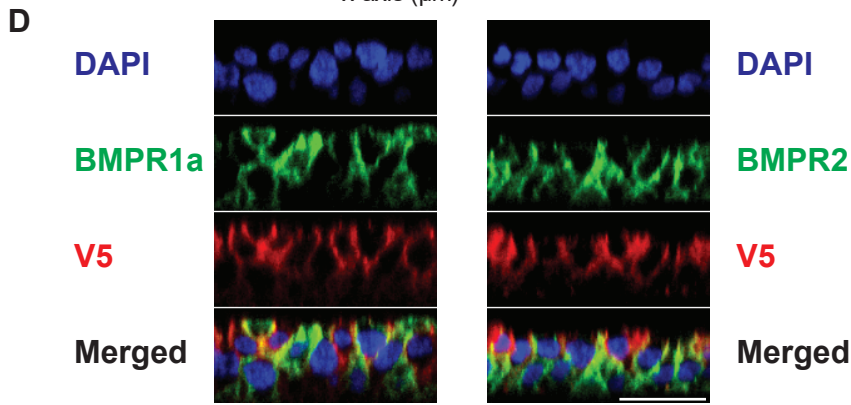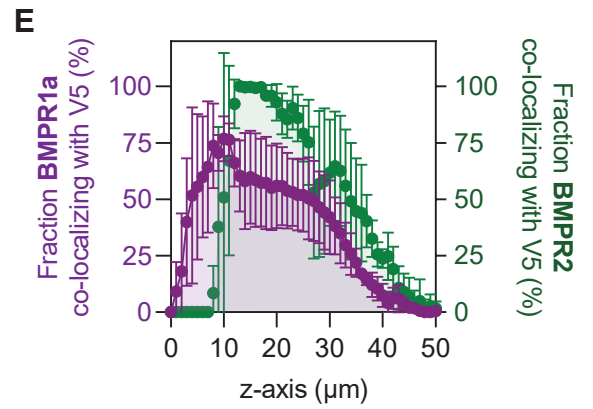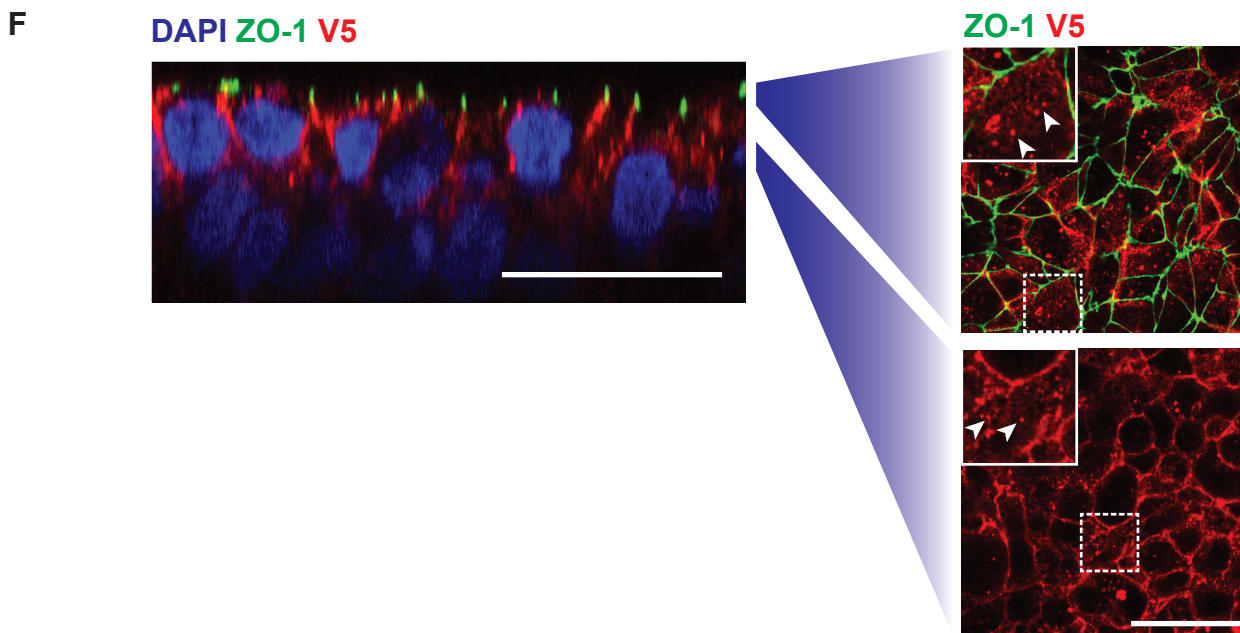

Supplement: NIHMS1702277-supplement-5.pdf [file NIHMS1702277-supplement-5.pdf]

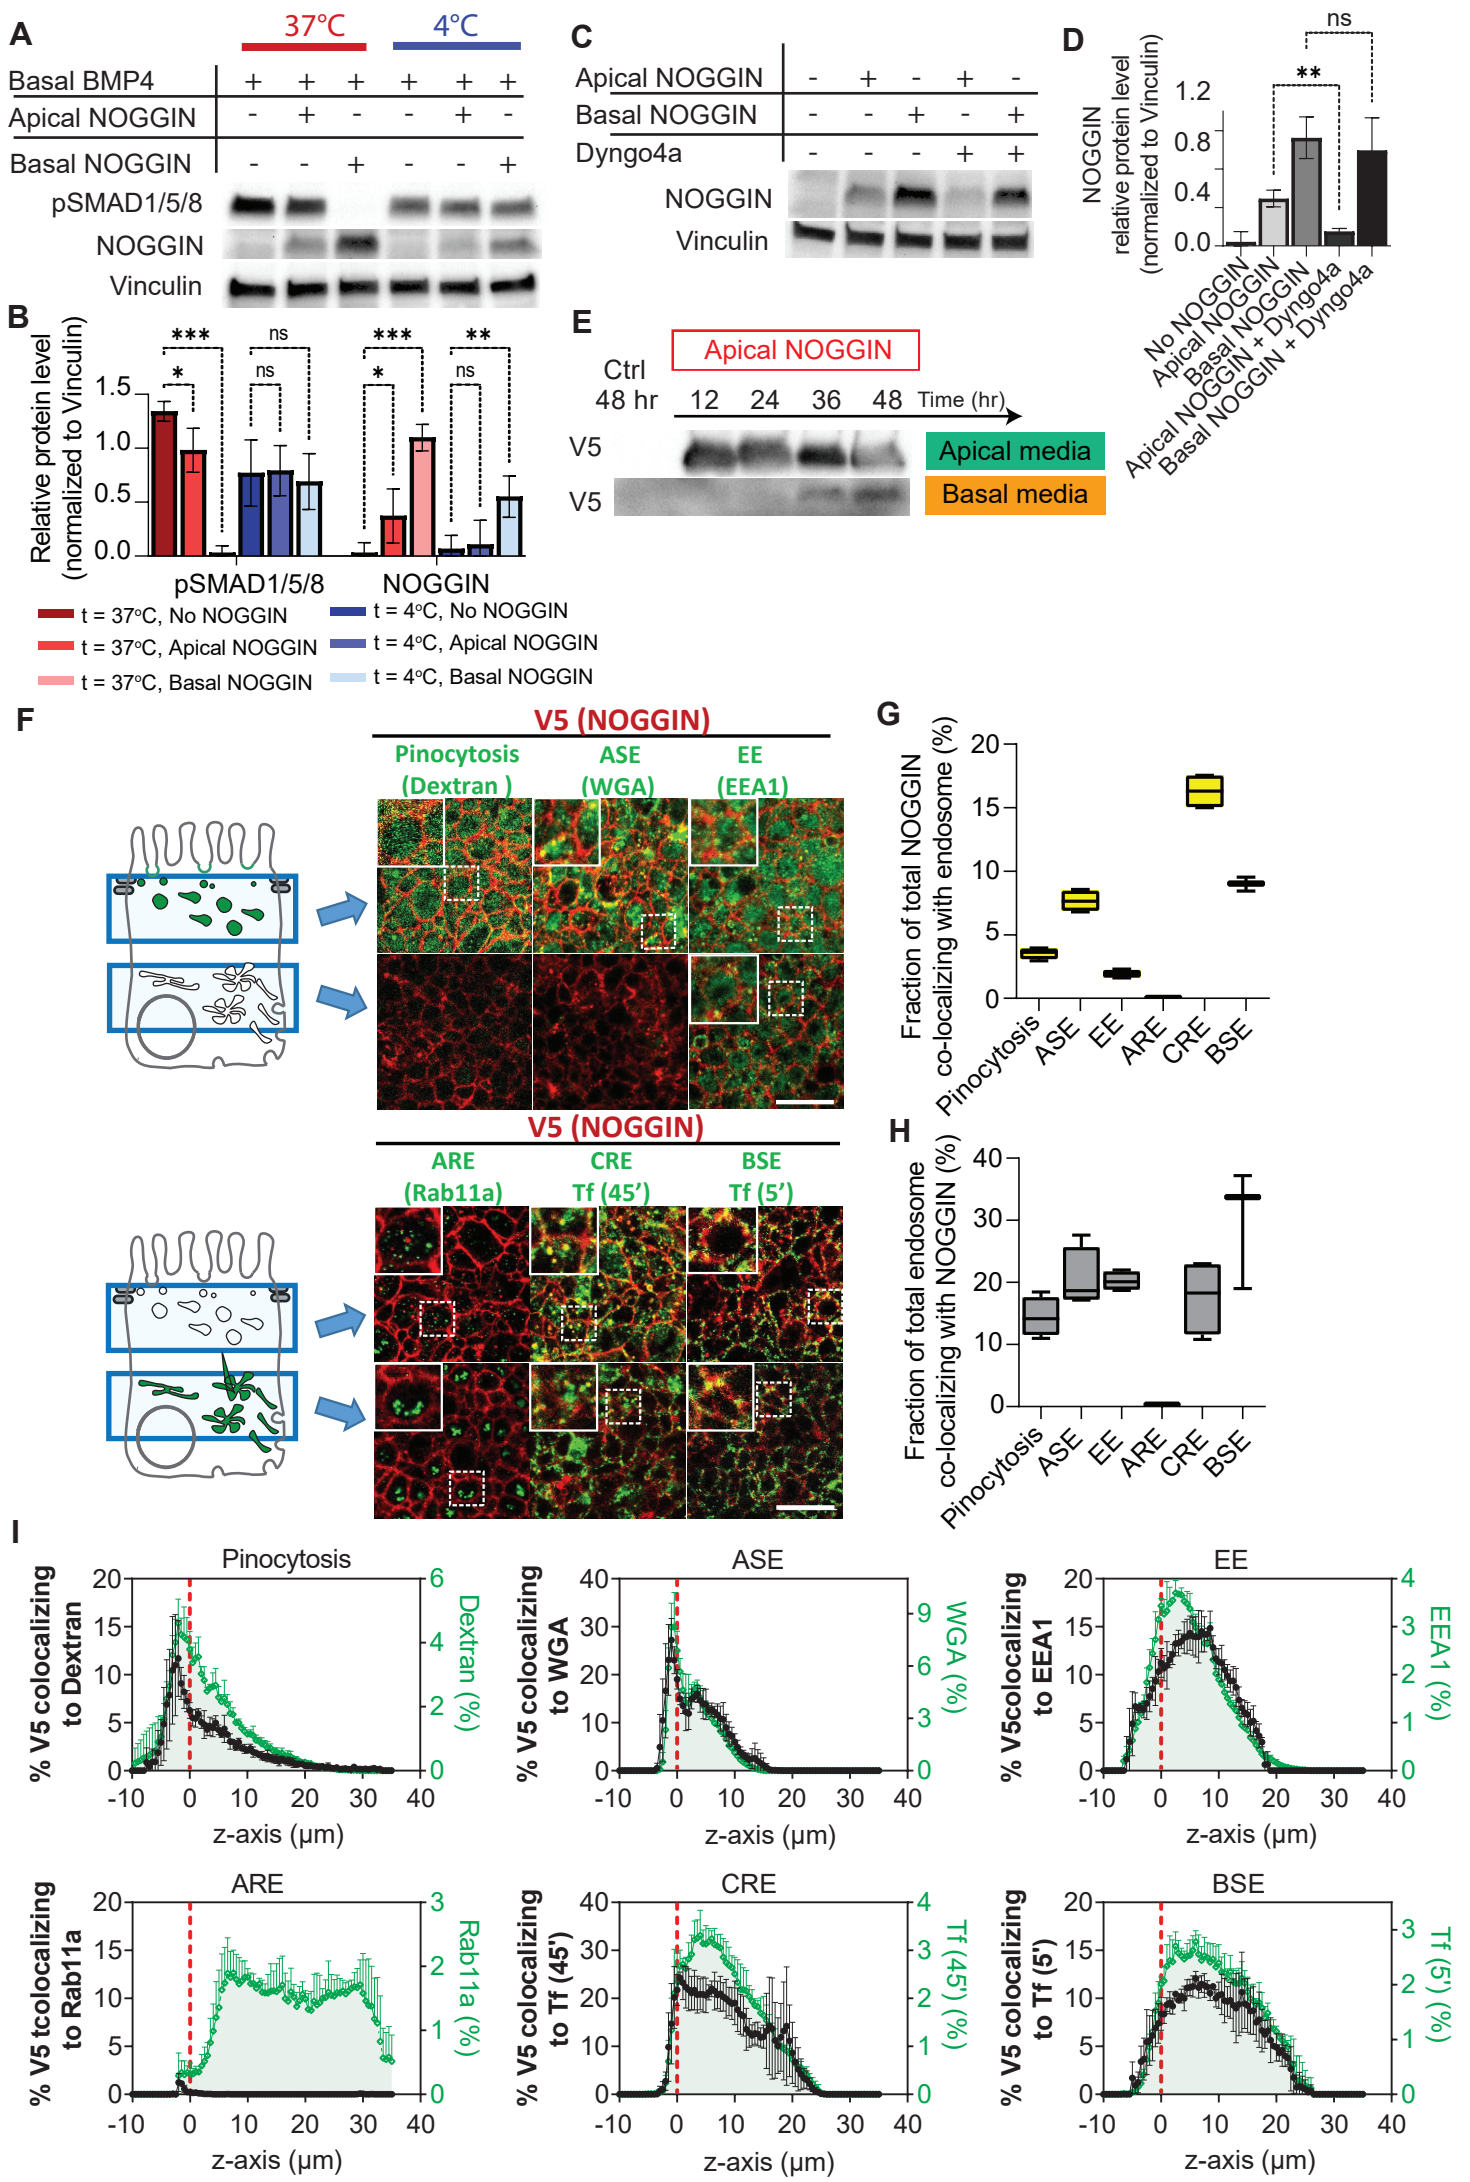

Supplement: NIHMS1702277-supplement-6.pdf [file NIHMS1702277-supplement-6.pdf]
